# Supplementary material
Source: MDPI journal article supplement (https://www.mdpi.com/2077-1312/11/2/264)
Supplement: s1 [file s1]

# Supplementary Materials:

**Table S1.** Sessile taxa were recorded in the different prototypes inside and outside the marina. The presence of organisms is shown by the dots “•”. Taxa were categorized as non-indigenous species (NIS), cryptogenic (C), native (N), or unresolved (U) based on literature and credited databases.

| Taxa      | Status | Species                                                          | Inside |    |     | Outside |    |     |
|-----------|--------|------------------------------------------------------------------|--------|----|-----|---------|----|-----|
|           |        |                                                                  | Box    | CD | PVC | Box     | CD | PVC |
| Crustacea | NIS    | <i>Balanus trigonus</i> Darwin, 1854                             |        |    |     |         | •  | •   |
|           | U      | <i>Chthamalus</i> Ranzani, 1817                                  |        |    |     | •       |    |     |
| Mollusca  | U      | Vermetidae Rafinesque, 1815                                      | •      | •  | •   | •       | •  | •   |
| Tunicata  | U      | <i>Ascidia</i> sp.                                               | •      | •  | •   |         |    |     |
|           | NIS    | <i>Botrylloides niger</i> Herdman, 1886                          | •      |    | •   |         |    |     |
|           | NIS    | <i>Botrylloides violaceus</i> Oka, 1927                          | •      | •  | •   |         |    |     |
|           | NIS    | <i>Botryllus schlosseri</i> (Pallas, 1766)                       |        | •  | •   |         |    |     |
|           | C      | <i>Diplosoma listerianum</i> (Milne Edwards, 1841)               | •      | •  | •   |         | •  | •   |
|           | NIS    | <i>Distaplia corolla</i> Monniot F., 1974                        | •      | •  | •   | •       |    | •   |
|           | U      | <i>Ecteinascidia</i> Herdman, 1880                               | •      |    | •   |         |    |     |
|           | N      | <i>Eudistoma angolanum</i> (Michaelsen, 1914)                    | •      | •  | •   | •       |    | •   |
|           | C      | <i>Perophora listeri</i> Wiegman, 1835                           | •      |    | •   |         |    |     |
|           | U      | <i>Stolidobranchia</i> indet.                                    |        | •  |     |         |    |     |
|           | C      | <i>Symplegma brakenhielmi</i> (Michaelsen, 1904)                 |        | •  |     |         |    |     |
|           | N      | <i>Trididemnum cereum</i> (Giard, 1872)                          |        |    |     | •       | •  | •   |
| Bryozoa   | C      | <i>Aetea anguina</i> (Linnaeus, 1758)                            |        |    | •   | •       | •  | •   |
|           | C      | <i>Aspiscellaria unicornis</i> (Liu, 1980)                       |        |    |     | •       |    | •   |
|           | U      | Bryozoa sp. 1                                                    |        |    |     | •       | •  | •   |
|           | U      | Bryozoa sp. 2                                                    |        |    |     |         |    | •   |
|           | U      | Bryozoa sp. 3                                                    |        |    |     |         |    | •   |
|           | U      | Bryozoa sp. 4                                                    |        |    |     | •       | •  | •   |
|           | NIS    | <i>Celleporaria inaudita</i> Tilbrook, Hayward & Gordon, 2001    | •      | •  | •   |         |    |     |
|           | C      | <i>Celleporina costazii</i> (Audouin, 1826)                      |        |    |     | •       |    | •   |
|           | NIS    | <i>Cradoscrupocellaria bertholletii</i> (Audouin, 1826)          | •      | •  | •   |         |    |     |
|           | C      | <i>Crassimarginatella crassimarginata</i> (Hincks, 1880)         |        |    |     | •       |    |     |
|           | C      | <i>Cribrilaria radiata</i> (Moll, 1803)                          |        |    |     | •       | •  | •   |
|           | C      | <i>Crisia denticulata</i> (Lamarck, 1816)                        |        |    | •   |         |    |     |
|           | U      | <i>Crisia</i> sp.                                                | •      | •  | •   | •       | •  | •   |
|           | C      | <i>Crisularia plumosa</i> (Pallas, 1766)                         | •      | •  | •   |         |    |     |
|           | C      | <i>Favosipora purpurea</i> Souto, Kaufmann & Canning-Clode, 2015 |        |    |     | •       | •  | •   |

|               |     |                                                                         |   |   |   |   |   |   |
|---------------|-----|-------------------------------------------------------------------------|---|---|---|---|---|---|
|               | C   | <i>Hemicyclopora multispinata</i> (Busk, 1861)                          |   |   |   | • | • | • |
|               | C   | <i>Hippoporella maderensis</i> Souto, Reverter-Gil & Ostrovsky, 2014    |   |   |   |   |   | • |
|               | C   | <i>Mollia multijuncta</i> (Waters, 1879)                                |   |   |   | • | • | • |
|               | C   | <i>Nolella gigantea</i> (Busk, 1856)                                    | • | • |   |   |   |   |
|               | NIS | <i>Parasmittina alba</i> Ramalho, Muricy & Taylor, 2011                 | • | • | • | • | • | • |
|               | C   | <i>Reptadeonella violacea</i> (Johnston, 1847)                          |   |   |   |   | • |   |
|               | C   | <i>Savignyella lafontii</i> (Audouin, 1826)                             |   |   |   | • | • | • |
|               | C   | <i>Schizomavella</i> (Schizomavella) <i>auriculata</i> (Hassall, 1842)  |   | • |   | • | • | • |
|               | NIS | <i>Schizoporella errata</i> (Waters, 1878)                              | • | • | • | • | • | • |
|               | NIS | <i>Schizoporella pungens</i> Canu & Bassler, 1928                       | • | • | • | • | • | • |
|               | N   | <i>Scrupocaberea maderensis</i> (Busk, 1860)                            |   |   |   | • | • | • |
|               | U   | <i>Smittoidea</i> sp.                                                   |   |   |   |   |   | • |
|               | NIS | <i>Tricellaria inopinata</i> d'Hondt & Occhipinti Ambrogi, 1985         |   |   |   |   |   | • |
|               | C   | <i>Tubulipora aperta</i> Harmer, 1898                                   |   |   |   | • | • | • |
|               | C   | <i>Tubulipora liliacea</i> (Pallas, 1766)                               |   |   |   | • | • | • |
|               | C   | <i>Virididentula dentata</i> (Lamouroux, 1816)                          |   |   |   | • | • | • |
| Polychaeta    | NIS | <i>Branchiomma bairdi</i> (McIntosh, 1885)                              | • |   |   |   | • |   |
|               | C   | <i>Protula tubularia</i> (Montagu, 1803)                                |   | • | • |   |   |   |
|               | U   | <i>Polychaeta</i> sp.                                                   |   | • | • |   |   |   |
|               | N   | <i>Salmacina dysteri</i> (Huxley, 1855)                                 | • | • | • | • | • | • |
|               | N   | <i>Spirobranchus triqueter</i> (Linnaeus, 1758)                         | • | • | • | • | • | • |
|               | U   | <i>Spirorbis</i> sp.                                                    | • | • | • | • | • |   |
|               | U   | <i>Cnidaria</i> sp.                                                     | • |   |   |   |   |   |
|               | NIS | <i>Ectopleura crocea</i> (Agassiz, 1862)                                |   |   | • | • | • | • |
|               | NIS | <i>Exaiptasia diaphana</i> (Rapp, 1829)                                 | • | • | • | • | • | • |
|               | C   | <i>Kirchenpaueria halecioides</i> (Alder, 1859)                         |   |   | • |   |   |   |
|               | U   | <i>Obelia</i> sp.                                                       | • | • | • |   |   | • |
|               | C   | <i>Sertularella ellisii</i> (Deshayes and Milne Edwards, 1836)          |   |   |   | • | • | • |
|               | U   | <i>Sertularella</i> sp.                                                 |   |   |   |   |   | • |
| Entoprocta    | C   | <i>Barentsia discreta</i> (Busk, 1886)                                  | • |   | • |   |   |   |
| Echinodermata | N   | <i>Arbacia lixula</i> (Linnaeus, 1758)                                  |   |   |   |   | • | • |
|               | N   | <i>Diadema africanum</i> Rodríguez, Hernández, Clemente & Coppard, 2013 |   |   |   |   | • |   |
|               | U   | <i>Echinodermata</i> sp.                                                |   |   |   | • | • | • |
| Porifera      | N   | <i>Clathrina clathrus</i> (Schmidt, 1864)                               | • | • | • | • | • | • |
|               | NIS | <i>Mycale</i> ( <i>Carmia</i> ) <i>senegalensis</i> Lévi, 1952          | • | • | • | • | • | • |

|            |     |                                                               |   |   |   |  |   |   |   |
|------------|-----|---------------------------------------------------------------|---|---|---|--|---|---|---|
|            | U   | <i>Mycale</i> sp. 1                                           |   |   |   |  |   |   | • |
|            | U   | <i>Mycale</i> sp. 2                                           | • | • | • |  | • | • | • |
|            | NIS | <i>Paraleucilla magna</i> Klautau, Monteiro & Borojevic, 2004 |   | • | • |  | • |   | • |
|            | U   | Porifera indet.                                               | • |   |   |  |   |   |   |
|            | U   | <i>Sycon</i> sp.                                              | • | • | • |  | • |   | • |
| Macroalgae | NIS | <i>Asparagopsis armata</i> Harvey, 1855                       | • |   |   |  | • | • | • |
|            | U   | Callithamniaceae sp.                                          |   | • | • |  |   |   |   |
|            | U   | <i>Calothrix</i> sp.                                          | • |   |   |  |   |   |   |
|            | U   | <i>Centroceras</i> Kützing, 1842 '1841'                       |   | • |   |  |   |   |   |
|            | U   | <i>Ceramium</i> Roth, 1797                                    | • |   | • |  |   |   |   |
|            | U   | <i>Chaetomorpha</i> Kützing, 1845                             | • |   | • |  |   | • | • |
|            | U   | <i>Chondria capillaris</i> (Hudson) M.J.Wynne, 1991           | • | • | • |  | • | • |   |
|            | U   | <i>Chylocladia</i> Greville, 1833                             |   | • |   |  |   |   |   |
|            | U   | <i>Cladophora</i> Kützing, 1843                               | • | • | • |  | • | • | • |
|            | U   | <i>Colpomenia</i> (Endlicher) Derbès & Solier, 1851           |   |   |   |  |   | • | • |
|            | U   | <i>Cottoniella</i> Børgesen, 1919                             |   | • |   |  |   |   |   |
|            | U   | <i>Crouania</i> J.Agardh, 1842                                |   |   |   |  |   | • |   |
|            | U   | Cyanophyta                                                    | • | • | • |  |   | • |   |
|            | U   | <i>Dasya</i> C.Agardh, 1824                                   | • |   |   |  |   | • |   |
|            | U   | Delesseriaceae Bory, 1828                                     |   | • |   |  |   |   |   |
|            | U   | <i>Dictyota</i> J.V.Lamouroux, 1809                           |   | • | • |  | • | • | • |
|            | U   | Filamentous green                                             |   | • |   |  | • | • | • |
|            | U   | Filamentous red                                               | • | • | • |  | • | • | • |
|            | U   | <i>Gelidium</i> J.V. Lamouroux, 1813                          | • | • |   |  |   |   |   |
|            | U   | <i>Hydroclathrus</i> Bory de Saint-Vincent, 1825              |   |   |   |  |   | • |   |
|            | U   | <i>Jania</i> J.V.Lamouroux, 1812                              |   |   | • |  |   | • |   |
|            | U   | Laminar red                                                   |   |   |   |  |   |   | • |
|            | N   | <i>Lithophyllum incrustans</i> Philippi, 1837                 | • | • | • |  | • | • | • |
|            | U   | <i>Lobophora</i> J.Agardh, 1894                               |   |   |   |  |   | • |   |
|            | U   | Macroalgae indet.                                             | • |   |   |  |   | • |   |
|            | U   | <i>Nemoderma</i> Schousboe ex Bornet, 1892                    | • | • | • |  | • | • | • |
|            | N   | <i>Padina pavonica</i> (Linnaeus) Thivy, 1960                 | • |   |   |  |   |   |   |
|            | N   | <i>Polysiphonia sertularioides</i> (Grateloup) J.Agardh, 1863 | • | • | • |  | • | • | • |
|            | U   | <i>Sphacelaria</i> Lyngbye, 1818                              |   | • |   |  |   |   |   |
|            | U   | <i>Spyridia</i> Harvey, 1833                                  |   | • |   |  |   |   |   |
|            | C   | <i>Ulva compressa</i> Linnaeus, 1753                          |   | • |   |  |   |   |   |
|            | U   | <i>Ulva</i> Linnaeus, 1753                                    | • | • |   |  |   |   |   |
|            | U   | <i>Ulvella</i> P.L.Crouan & H.M.Crouan, 1859                  | • |   |   |  |   |   |   |

**Table S2.** Mobile fauna recorded in the different prototypes inside and outside the marina. The presence of organisms is shown by the dots “•”.

| Taxa            | Taxa            | Inside |    |     | Outside |    |     |
|-----------------|-----------------|--------|----|-----|---------|----|-----|
|                 |                 | Box    | CD | PVC | Box     | CD | PVC |
| Balanoidea      |                 |        |    |     |         | •  |     |
|                 | Caprelloidea    | •      | •  | •   | •       | •  | •   |
|                 | Caridea         | •      | •  | •   | •       | •  | •   |
|                 | Decapoda        | •      | •  | •   | •       | •  | •   |
|                 | Gammaridea      | •      | •  | •   | •       | •  | •   |
| Crustacea       | Gastropoda      | •      | •  | •   | •       | •  | •   |
|                 | Isopoda         | •      | •  | •   | •       | •  | •   |
|                 | Mysidacea       | •      | •  | •   | •       |    | •   |
|                 | Ostracoda       | •      | •  |     |         |    |     |
|                 | Pycnogonida     |        |    |     | •       | •  | •   |
| Mollusca        | Bivalvia        | •      | •  | •   | •       | •  | •   |
|                 | Polyplacophora  |        |    | •   | •       | •  |     |
| Polychaeta      | Polychaeta      | •      | •  | •   | •       | •  | •   |
|                 | Echinoidea      |        |    | •   | •       | •  | •   |
| Echinodermata   | Holothuridae    |        | •  |     |         |    |     |
|                 | Ophiuroidea     |        | •  | •   | •       | •  | •   |
| Platyhelminthes | Platyhelminthes |        |    |     | •       | •  | •   |
| Sipuncula       | Sipuncula       | •      |    |     | •       | •  |     |
| Chordata        | Gobiesociformes |        |    |     | •       | •  | •   |

(A) CD prototype marina

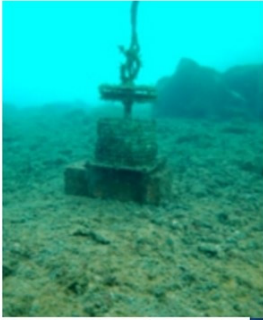

(B) Prototypes coast

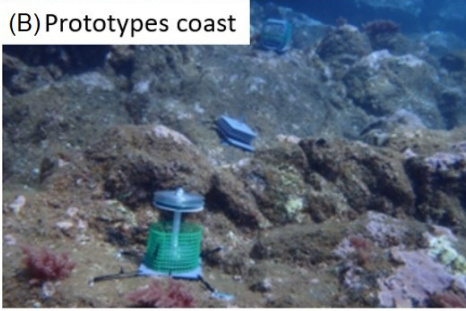

**Figure S1:** The CD prototype deployed at the marina, fixed with a rope to the pontoon (A), and all three prototypes deployed at the open coast (B).
